# Supplementary material for: A Systematic Review and Meta-Analysis of the Effects of Various Sources and Amounts of Copper on Nursery Piglets
Source: MDPI journal article supplement (doi:10.3390/vetsci11020068), 2024-02-02
Supplement: s1 [file s1]

Table S1. Database used in meta-analysis approach of copper fonts and levels supplemented in nursery piglet's diets [10, 11, 29, 30, 41-96].

| Study | Authors                   | Year | Country     | N animal | Source <sup>1</sup> | AAFCO <sup>2</sup> | Level, ppm | Genetic lines <sup>3</sup> | Age Ini, d | BW Ini, kg | Performance data |
|-------|---------------------------|------|-------------|----------|---------------------|--------------------|------------|----------------------------|------------|------------|------------------|
| 41    | Apgar et al.              | 1995 | USA         | 176      | INO/ORG             | SUL/CA             | 100-200    | Crossb                     | 21         | 8.23       | Yes              |
| 42    | Armstrong et al.          | 2000 | USA         | 121      | INO/ORG             | SUL/QMA            | 10-225     | HxLxDxY                    | 20         | 6.40       | Yes              |
| 43    | Bikker et al.             | 2016 | Netherlands | 80       | INO                 | SUL                | 80-160     | LxD                        | 26         | 7.90       | Yes              |
| 44    | Capps et al.              | 2020 | -           | 320      | INO                 | SUL                | 200        | DNA®                       | 21         | 7.40       | Yes              |
| 45    | Coffey et al.             | 1994 | USA         | 1300     | INO/ORG             | SUL/CA             | 100-200    | Crossb                     | 21         | 7.45       | Yes              |
| 46    | Cromwell                  | 1998 | USA         | 635      | INO                 | SUL/CL             | 100-200    | HxY                        | 29         | 8.63       | Yes              |
| 47    | Davis et al.              | 2002 | USA         | 216      | INO                 | SUL                | 20-175     | HxLxDxY                    | 18         | 6.00       | Yes              |
| 29    | Di Giancamillo et al.     | 2017 | Italy       | 90       | INO                 | SUL                | 150        | LxLW                       | 26         | 8.40       | <b>No</b>        |
| 48    | Ding et al.               | 2021 | China       | 400      | INO                 | SUL                | 80-120     | DxLxY                      | 24         | 9.40       | Yes              |
| 49    | Dove and Ewan             | 1990 | USA         | 64       | INO                 | SUL                | 5-250      | YxLxD                      | 24         | 7.19       | Yes              |
| 50    | Dove and Ewan             | 1991 | USA         | 32       | INO                 | SUL                | 5-225      | YxLxD                      | -          | 15.6       | Yes              |
| 51    | Dove                      | 1995 | USA         | 90       | INO                 | SUL                | 250        | YxHxD                      | 26         | 6.82       | Yes              |
| 52    | Espinosa et al.           | 2017 | USA         | 80       | INO                 | CL                 | 14-171     | PIC®                       | -          | 6.80       | Yes              |
| 53    | Espinosa et al.           | 2020 | USA         | 32       | INO                 | CL                 | 150        | PIC®                       | 28         | 8.33       | Yes              |
| 54    | Federizzi et al.          | 2014 | Brazil      | 2880     | ORG                 | CA                 | 30         | LxLW                       | 23         | 6.95       | Yes              |
| 55    | Gonzalez-Eguia et al      | 2009 | China       | 115      | INO                 | SUL                | 17-50      | YxLxD                      | 28         | 9.63       | Yes              |
| 56    | Gonzalez-Esquerria et al. | 2005 | Brazil      | 256      | INO/ORG             | SUL/QMA/TBBC       | 160        | PIC®                       | 24         | 6.13       | Yes              |
| 57    | Gurgel et al.             | 2014 | Brazil      | 96       | INO/ORG             | SUL/CA             | 150-580    | PIC®                       | 24         | 3.91       | Yes              |
| 58    | Hauschild                 | 2012 | Brazil      | 64       | ORG                 | CA                 | 200-250    | Crossb                     | 21         | 6.73       | Yes              |
| 59    | Hedemem et al.            | 2006 | Denmark     | 32       | INO                 | SUL                | 175        | DLxY                       | 28         | 8.20       | Yes              |
| 60    | Hill et al.               | 2000 | USA         | 1365     | INO                 | SUL                | 15-266     | -                          | 22         | 6.55       | Yes              |
| 30    | Huang et al.              | 2015 | China       | 48       | INO                 | SUL/TBBC           | 225        | -                          | 21         | 7.03       | Yes              |
| 61    | Jiao et al.               | 2018 | China       | 108      | INO                 | SUL                | 75         | DLxY                       | 21         | 6.36       | Yes              |
| 62    | Liao et al.               | 2017 | China       | 18       | INO/ORG             | SUL/CA             | 160        | Crossb                     | 28         | 6.34       | Yes              |
| 10    | Lin et al                 | 2020 | China       | 840      | INO/ORG             | TBBC/PT            | 5-160      | DxLxY                      | 28         | 7.38       | Yes              |
| 63    | Liu et al.                | 2020 | China       | 288      | INO/ORG             | SUL/CA             | 100-150    | DxLxY                      | 23         | 8.79       | Yes              |
| 64    | Lima et al.               | 2003 | Brazil      | 80       | INO/ORG             | SUL/QMA            | 50-200     | Crossb                     | 21         | 6.85       | Yes              |
| 65    | Luo and Dove              | 1996 | USA         | 32       | INO/ORG             | SUL                | 15-250     | YxHxD                      | 26         | 6.80       | Yes              |
| 66    | Mei et al.                | 2009 | China       | 100      | INO                 | CA                 | 10-250     | DxLHxY                     | 19         | 7.50       | Yes              |
| 67    | Ma et al.                 | 2012 | USA         | -        | INO/ORG             | SUL/CA             | 15         | YxHxD                      | 21         | 7.40       | Yes              |

Table S1. Database used in meta-analysis approach of copper fonts and levels supplemented in nursery piglet's diets.

| Study | Authors           | Year | Country     | N animal | Source <sup>1</sup> | AAFCO <sup>2</sup> | Level, ppm | Genetic lines <sup>3</sup> | Age Ini, d | BW Ini, kg | Performance data |
|-------|-------------------|------|-------------|----------|---------------------|--------------------|------------|----------------------------|------------|------------|------------------|
| 68    | Ma et al          | 2015 | USA         | 150      | INO/ORG             | SUL/CA             | 125-250    | -                          | 21         | 5.80       | Yes              |
| 69    | Martin et al.     | 2011 | USA         | 160      | INO/ORG             | SUL/CA             | 50-150     | YxLxPIC®                   | 35         | 6.30       | Yes              |
| 70    | Medonça           | 2018 | Brazil      | 80       | INO                 | SUL                | 100/3000   | -                          | 21         | 5.68       | Yes              |
| 71    | Mello et al.      | 2012 | Brazil      | 126      | ORG                 | CA                 | 75-300     | -                          | 21         | 6.10       | Yes              |
| 72    | Muniz et al.      | 2010 | Brazil      | -        | INO/ORG             | SUL/CA             | 50-240     | -                          | 21         | 5.36       | Yes              |
| 73    | Nankung et al.    | 2006 | Canada      | 180      | INO                 | SUL                | 250        | Crossb                     | 17         | 5.90       | Yes              |
| 74    | Okiyama           | 2017 | Brazil      | 24       | INO/ORG             | SUL/CL             | 125-200    | -                          | 35         | 6.10       | Yes              |
| 75    | Pastorelli et al. | 2013 | Italy       | 150      | INO                 | SUL                | 75-150     | LxLW                       | 26         | 8.44       | Yes              |
| 76-1  | Pérez et al.      | 2011 | USA         | 176      | ORG                 | CA                 | 100        | YxLxD                      | 21         | 5.80       | Yes              |
| 76-2  | Pérez et al.      | 2011 | USA         | 1008     | ORG                 | CA                 | 100        | YxLxD                      | 21         | 5.20       | Yes              |
| 76-3  | Pérez et al.      | 2011 | USA         | 120      | INO/ORG             | SUL/CA             | 100-250    | YxLxD                      | 21         | 7.00       | Yes              |
| 76-4  | Pérez et al.      | 2011 | USA         | -        | INO/ORG             | SUL/CA             | 100-315    | YxL                        | 21         | 5,70       | Yes              |
| 77    | Possobon          | 1991 | Brazil      | 85       | INO                 | SUL                | 75-300     | LHxDxMe                    | -          | 9.20       | Yes              |
| 78    | Ren et al.        | 2021 |             | 192      |                     | SUL/CA             | 125        | PIC®                       | -          | 6.06       | Yes              |
| 79    | Schaaf            | 2017 | USA         | 280      | INO                 | SUL/CL             | 50-150     | PIC®                       | 20         | 7.00       | Yes              |
| 80    | Shelton et al.    | 2011 | USA         | 216      | INO                 | SUL                | 125-200    | -                          | 21         | 8.79       | Yes              |
| 81    | Shurson et al.    | 1990 | USA         | 10       | INO                 | SUL                | 16-283     | DxLxY                      | 28         | 5.50       | No               |
| 82    | Smith et al.      | 1997 | USA         | 3240     | INO                 | SUL                | 250        | -                          | 17         | 4.45       | Yes              |
| 83    | Song et al.       | 2012 | China       | 96       | INO                 | MMT                | 750-1500   | YxLxD                      | 21         | 5.60       | Yes              |
| 84    | Stansbury et al.  | 1990 | USA         | 231      | INO/ORG             | SUL/POL            | 31,25-250  | HxLxDxY                    | 28         | 6.81       | Yes              |
| 85    | Thomaz et al.     | 2015 | Brazil      | 70       | INO/ORG             | SUL/CA             | 125/250    | -                          | 21         | 6.70       | Yes              |
| 86    | Veum et al.       | 2004 | USA         | 480      | INO/ORG             | SUL/PT             | 25-250     | YxLxD                      | 20         | 6.31       | Yes              |
| 87    | Windish et al.    | 2001 | Germany     | 96       | INO                 | SUL                | 25-175     | -                          | 28         | 7.70       | Yes              |
| 88    | Xia et al.        | 2005 | China       | 128      | INO                 | SUL/MMT            | 40-150     | DxLxY                      | 21         | 7.50       | Yes              |
| 11    | Yue et al.        | 2017 | China       | 160      | INO/ORG             | SUL/POL            | 100        | YxLxD                      | 28         | 7.74       | Yes              |
| 89    | Yang et al.       | 2010 | China       | 45       | INO/ORG             | SUL/CA             | 125        | Crossb                     | -          | 7.50       | Yes              |
| 90    | Zhang et al.      | 2019 | Brazil      | 48       | INO                 | SUL                | 200        | -                          | 21         | 8.26       | Yes              |
| 91    | Zhang et al.      | 2013 | South Korea | 90       | ORG                 | CA/QMA             | 100        | YxL                        | 21         | 7.84       | Yes              |
| 92    | Zhao et al.       | 2014 | Spain       | 240      | INO/ORG             | SUL/POL            | 6-170      | LWXL                       | 26         | 7.36       | Yes              |
| 93    | Zhao et al.       | 2007 | USA         | 192      | ORG                 | CA                 | 200-400    | DxLxY                      | 18         | 6.02       | Yes              |

Table S1. Database used in meta-analysis approach of copper fonts and levels supplemented in nursery piglet's diets.

| Study | Year        | Authors | Country | N animal | Source <sup>1</sup> | AAFCO <sup>2</sup> | Level, ppm | Genetic lines <sup>3</sup> | Age Ini, d | BW Ini, kg | Performance data |
|-------|-------------|---------|---------|----------|---------------------|--------------------|------------|----------------------------|------------|------------|------------------|
| 94-1  | Zhou et al. | 1994    | USA     | 42       | INO                 | SUL                | 15-200     | Crossb                     | 21         | 8.90       | Yes              |
| 94-2  | Zhou et al. | 1994    | USA     | 96       | INO/ORG             | SUL/CA             | 15-200     | Crossb                     | 21         | 6.81       | Yes              |
| 95-1  | Zhou et al. | 1994    | USA     | 144      | INO                 | CL                 | 25-100     | YxD                        | -          | 6.60       | Yes              |
| 95-2  | Zhou et al. | 1994    | USA     | 45       | INO                 | CL                 | 25-        | -                          | -          | 7.10       | Yes              |
| 96    | Zhu et al.  | 2011    | China   | 100      | INO                 | SUL                | 100-250    | DxLxY                      | 28         | 12.29      | Yes              |

<sup>1</sup>INO: Copper Inorganic, ORG: Copper Organic <sup>2</sup>Classified according "The Association of American Feed Control Officials", SUL: Copper Sulfate, CA: Copper complexed with amino acids, POL: Copper complexed with polysaccharides, PT: Copper complexed with proteins, TBBC: Tetrabasic Copper, QMA: Organic metal chelate; <sup>3</sup>S: supranutritional, R: Requirements. <sup>3</sup> Crossb: crossbreed; D: Duroc; H: Hampshire; L: Landrace; LW: Large White; Me: Meishan; Y: Yorkshire; DNA®: DNA Genetics; PIC®: Pig Improvement Company, Hendersonville, TN.
